# Supplementary material for: Scan-o-matic: High-Resolution Microbial Phenomics at a Massive Scale
Source: PubMed Central journal article supplement (PMC5015956; doi:10.1534/g3.116.032342), 2016-06-30
Supplement: supp_g3.116.032342_FigureS1.pdf [file supp_g3.116.032342_FigureS1.pdf]

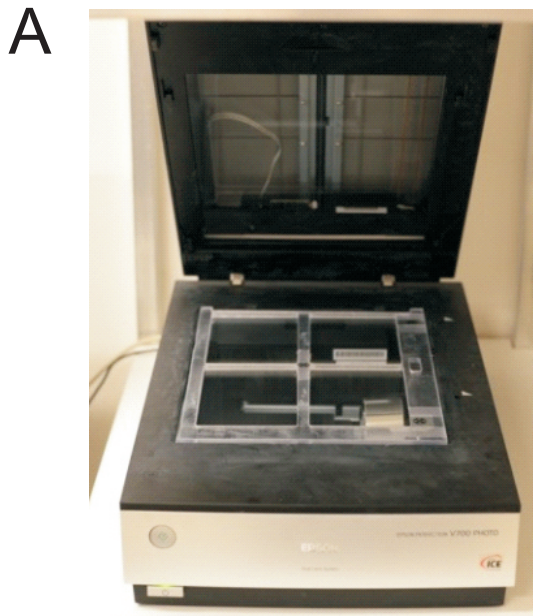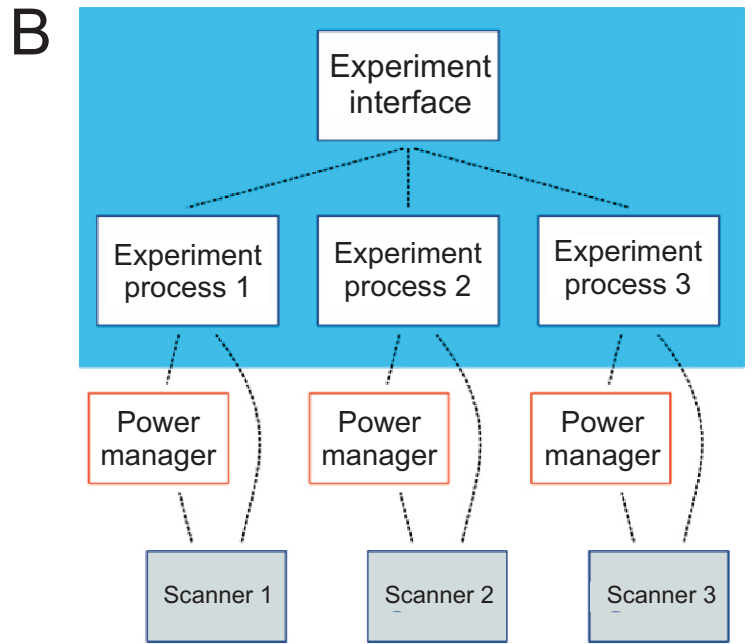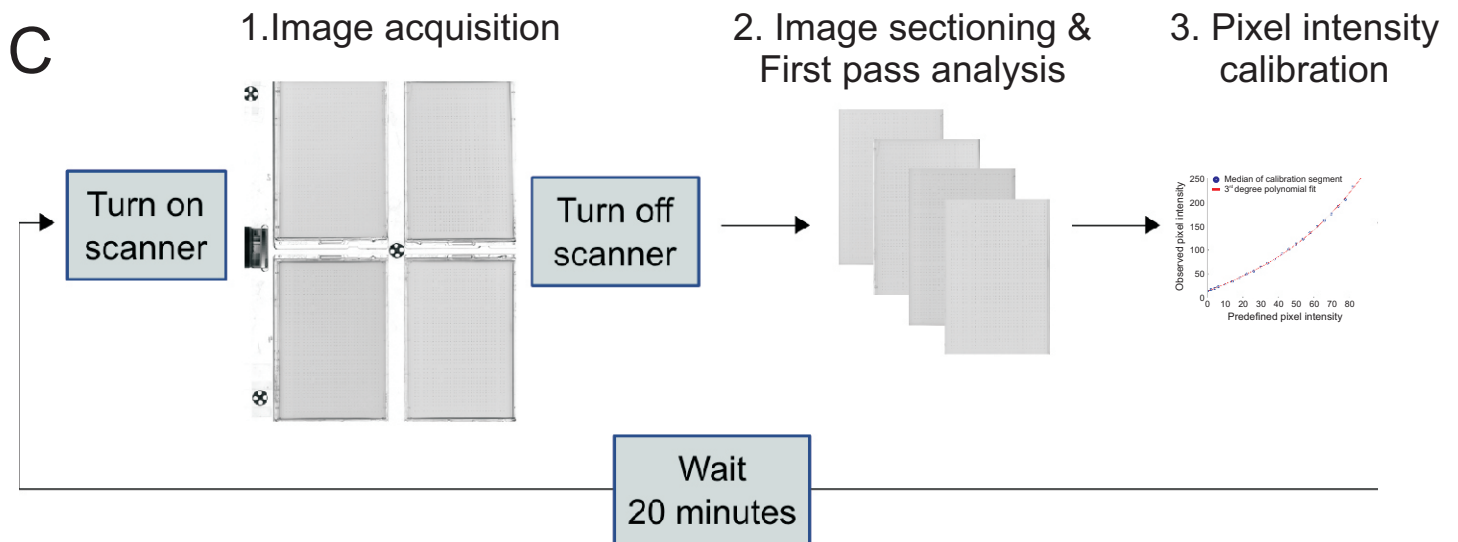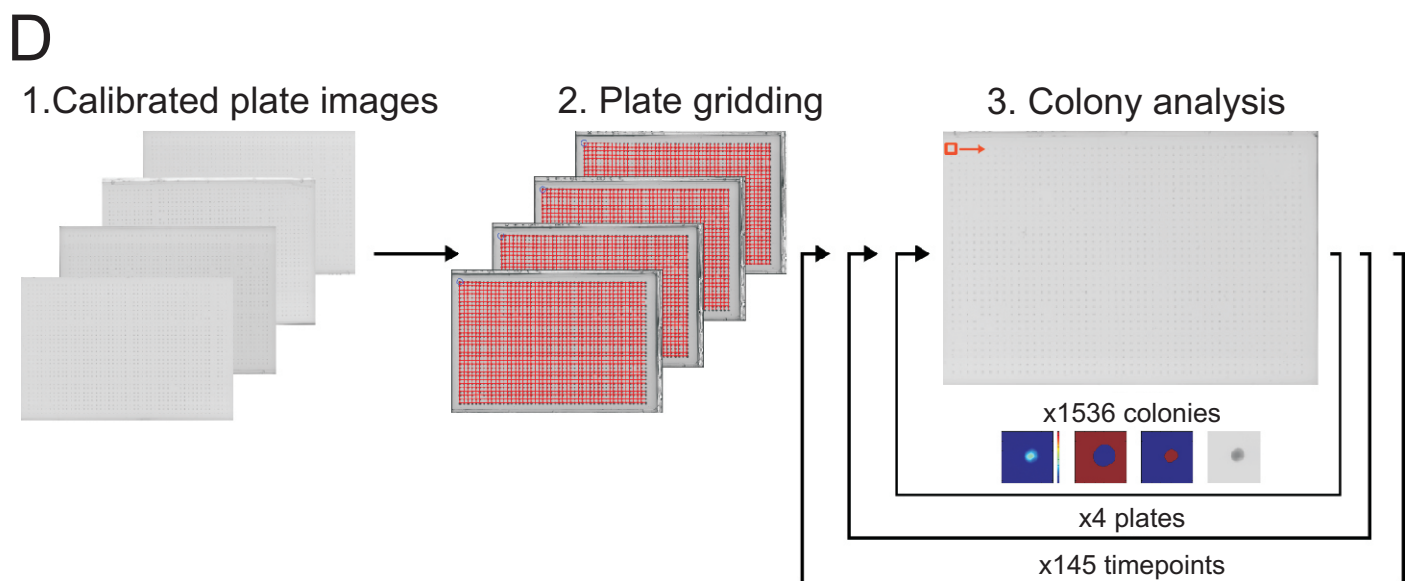

Figure S1 Zackrisson *et al*
