# Supplementary material for: Scan-o-matic: High-Resolution Microbial Phenomics at a Massive Scale
Source: PubMed Central journal article supplement (PMC5015956; doi:10.1534/g3.116.032342), 2016-06-30

A. Raw image

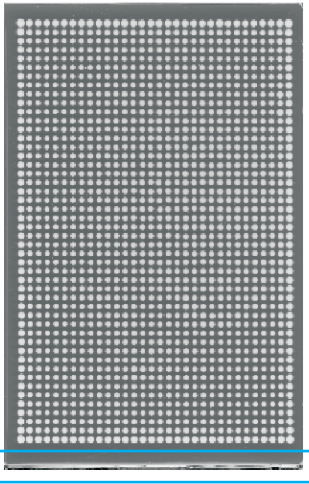

B. Local Otsu-threshold surface

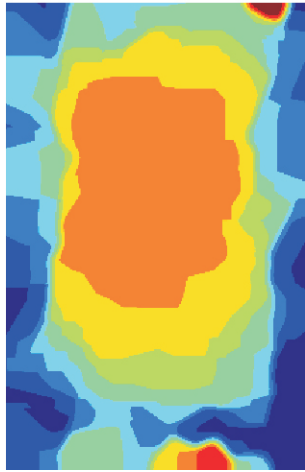

C. Blob calling

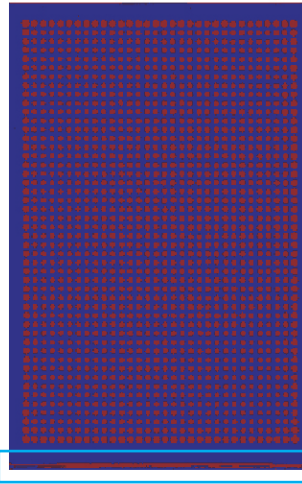

D. Blob simplification

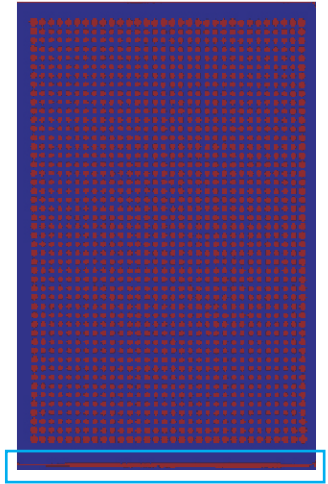

E. Size selection

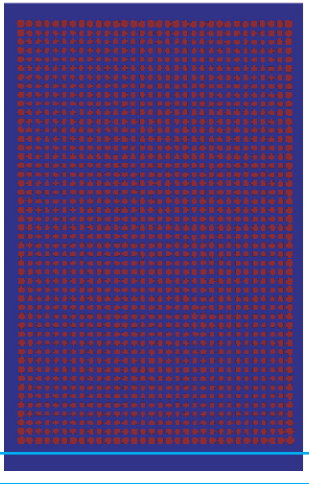

F. Shape selection

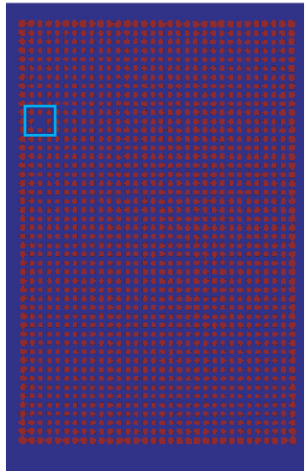

G. Grid placement

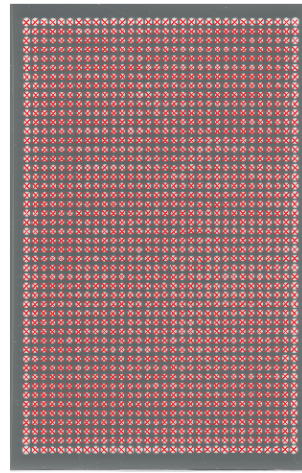

H. Detailed view of grid placement

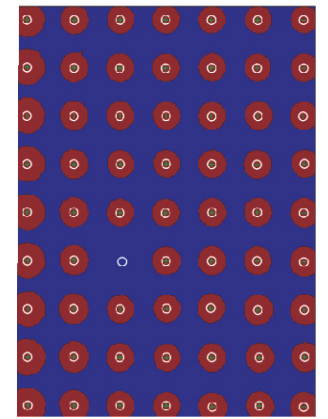

Supplement: supp_g3.116.032342_FigureS4.pdf [file supp_g3.116.032342_FigureS4.pdf]
