# Supplementary material for: Scan-o-matic: High-Resolution Microbial Phenomics at a Massive Scale
Source: PubMed Central journal article supplement (PMC5015956; doi:10.1534/g3.116.032342), 2016-06-30
Supplement: supp_g3.116.032342_FigureS13.pdf [file supp_g3.116.032342_FigureS13.pdf]

Normalization w/o removing control extremes

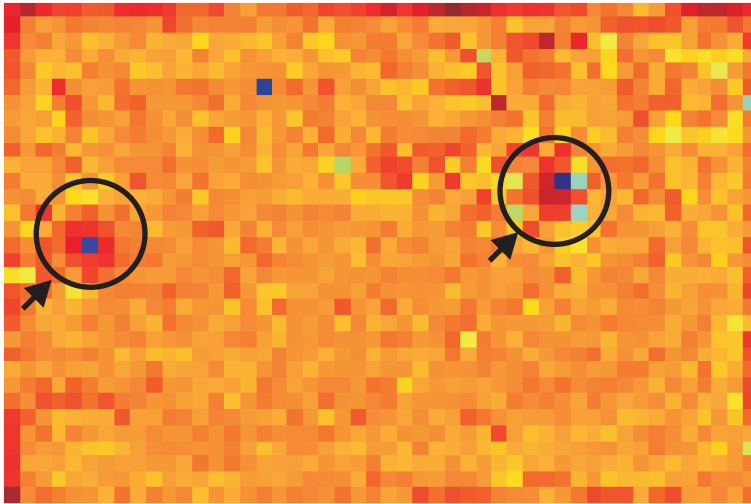

Normalization w. removing control extremes

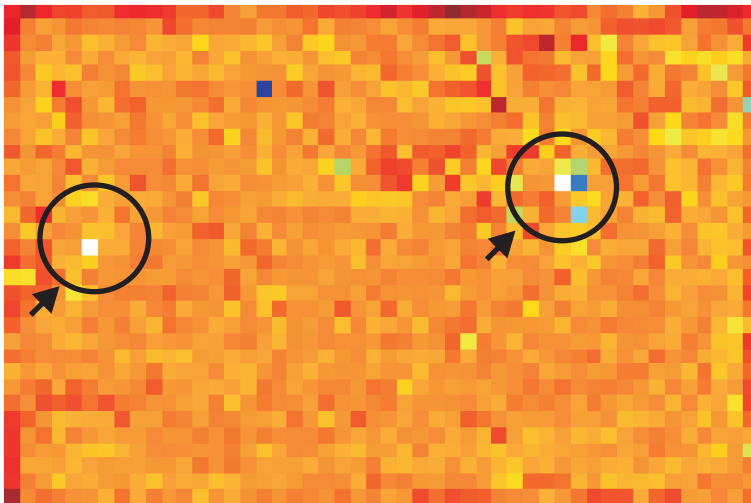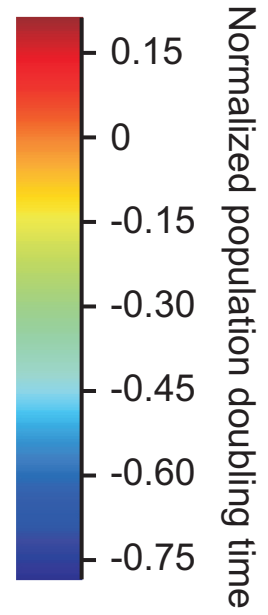

Figure S13 Zackrisson *et al*
